# Supplementary material for: Impact of the Sensory and Sympathetic Nervous System on Fracture Healing in Ovariectomized Mice
Source: PubMed Central journal article supplement (PMC7013559; doi:10.3390/ijms21020405), 2020-01-08
Supplement: ijms-21-00405-s001.pdf [file ijms-21-00405-s001.pdf]

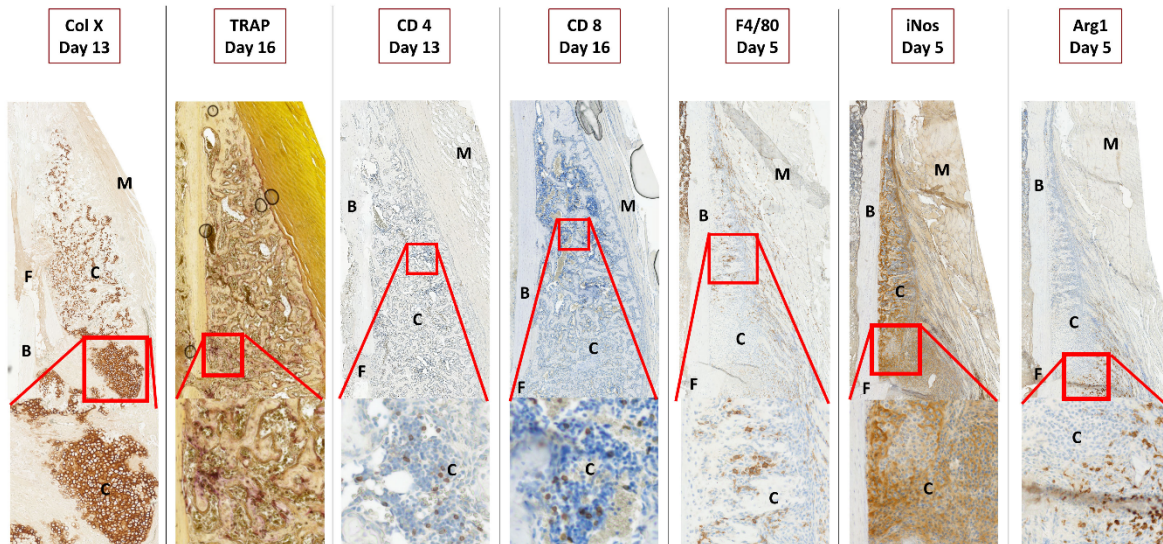

**Supplementary Figure 1: Representative images of histological and immunohistological stainings in callus tissue from WT control animals** – comparable to the representative images shown in Figures 5, 6 and 7. Overview images were scanned with 20-fold magnification (TissueFaxSI plus). Red boxes demonstrate the enlarged view. B=bone, C=Callus tissue, BM=bone marrow, F=Fracture site, M=Muscle.
